# Supplementary material
Source: PubMed Central journal article supplement (PMC3190776)
Supplement: supp_M111.280206_jbc.M111.280206-1.pdf [file supp_M111.280206_jbc.M111.280206-1.pdf]

Figure S1

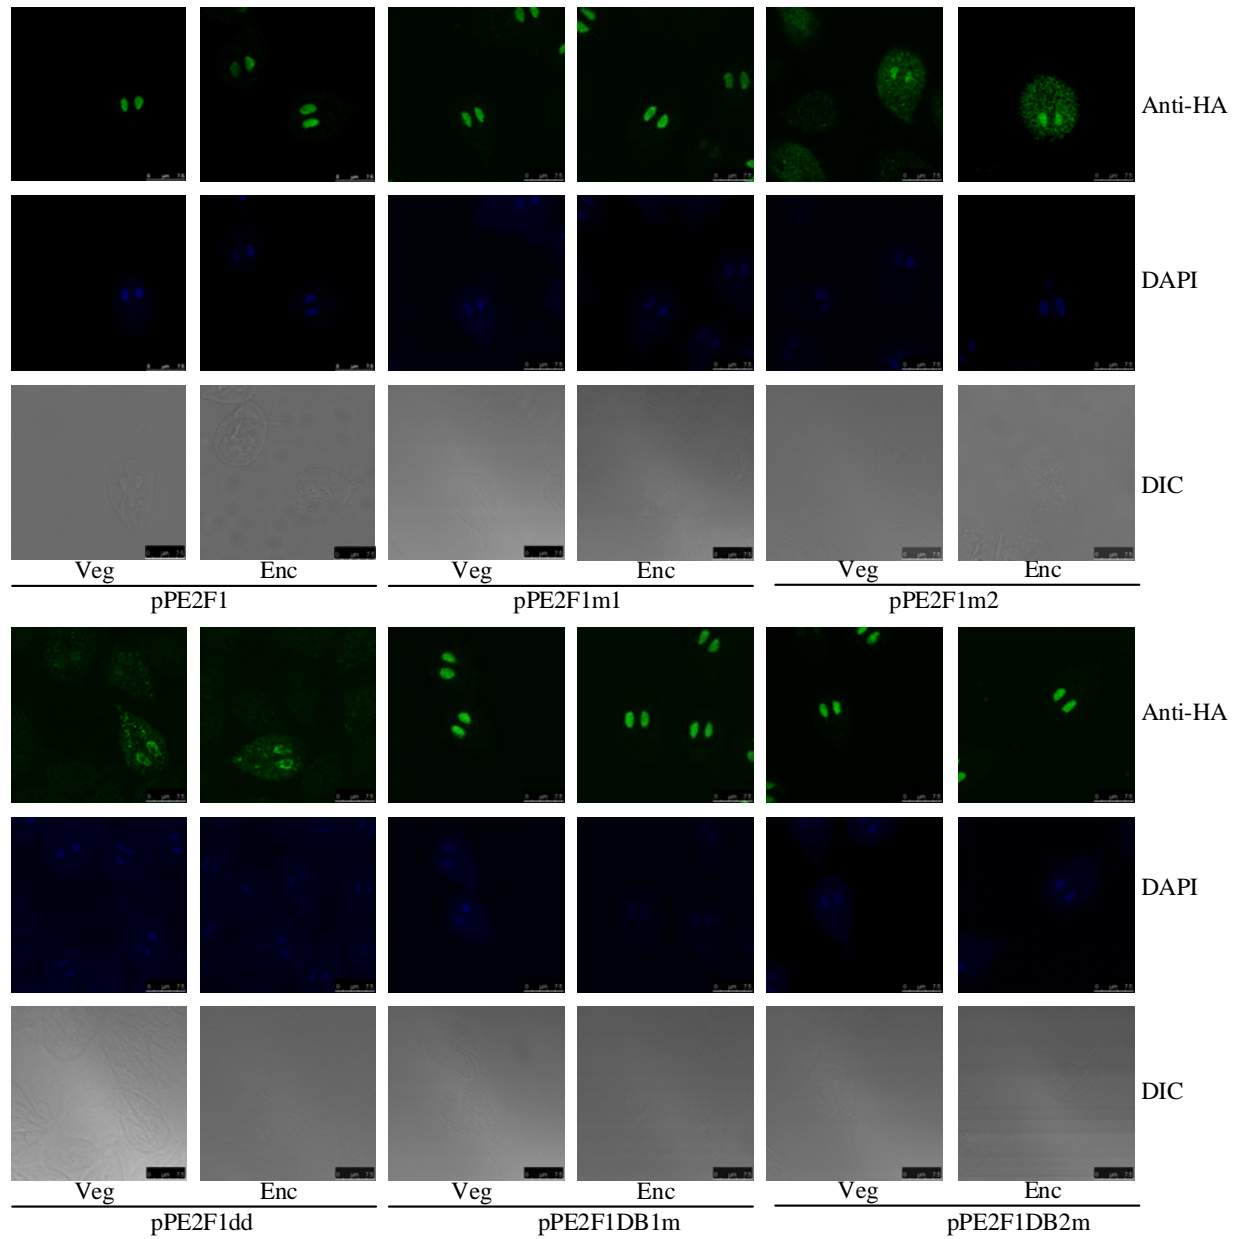

Fig. S1. Localization of the E2F1 and its mutants. Immunofluorescence assays were performed as described in Figs. 2 and 7. More images are shown in this Fig. DAPI staining of cell nuclei and differential interference contrast (DIC) images are also shown.
